# Supplementary material for: Effect of Ga2O3 Addition on the Properties of Garnet-Type Ta-Doped Li7La3Zr2O12 Solid Electrolyte
Source: MDPI journal article supplement (doi:10.3390/batteries8100158), 2022-10-06
Supplement: s1 [file s1]

# Supplementary Materials for

## Effect of $\text{Ga}_2\text{O}_3$ Addition on the Properties of Garnet-Type Ta-Doped $\text{Li}_7\text{La}_3\text{Zr}_2\text{O}_{12}$ Solid Electrolyte

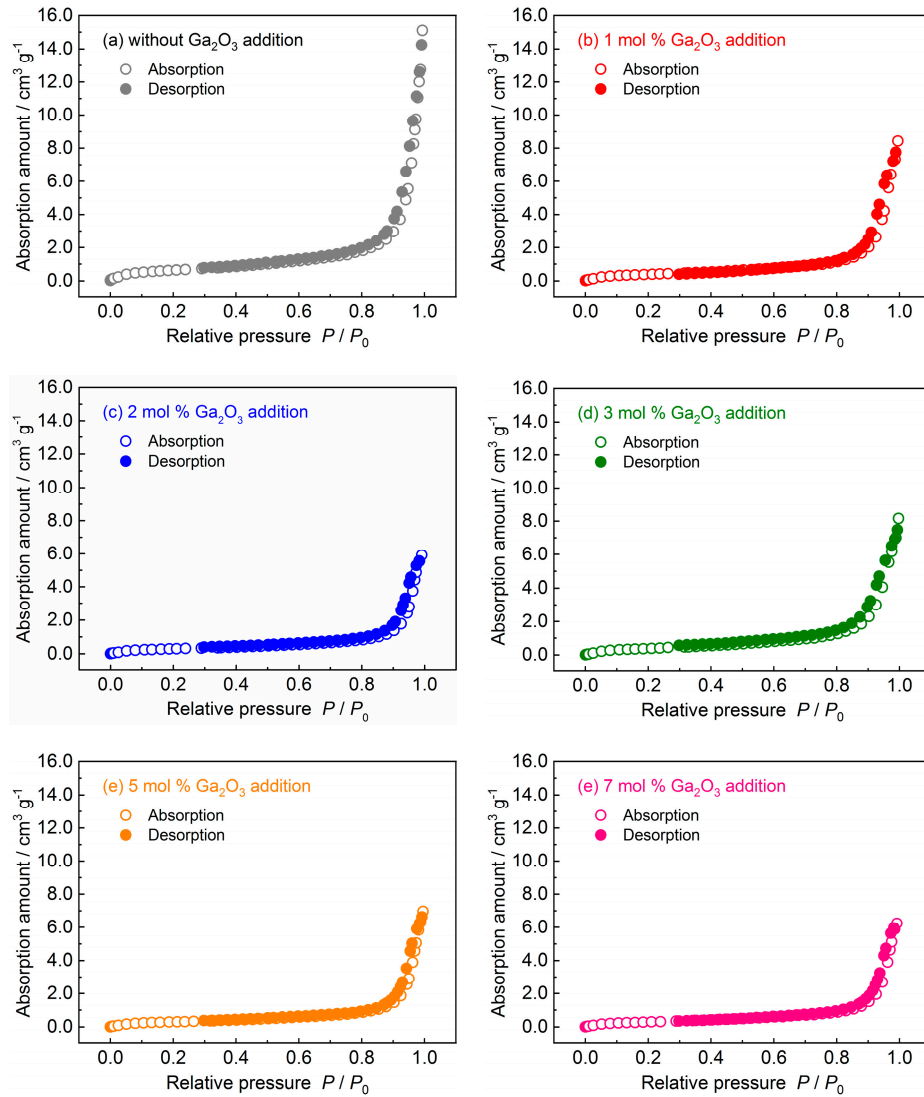

**Figure S1.**  $\text{N}_2$  gas adsorption/desorption isotherms for Ta-doped LLZO with or without  $\text{Ga}_2\text{O}_3$  addition.

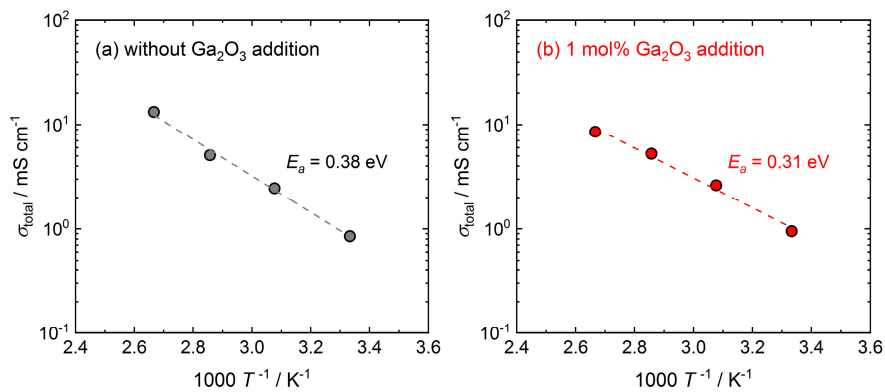

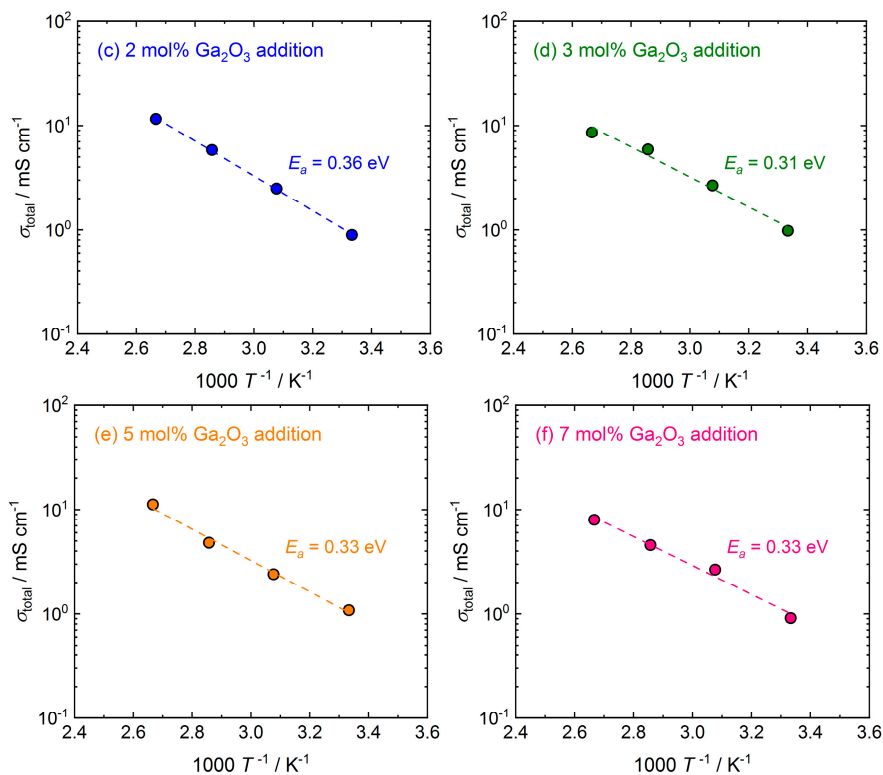

**Figure S2.** Temperature dependence for total ionic conductivity  $\sigma_{\text{total}}$  for Ta-doped LLZO sintered with or without  $\text{Ga}_2\text{O}_3$  addition.

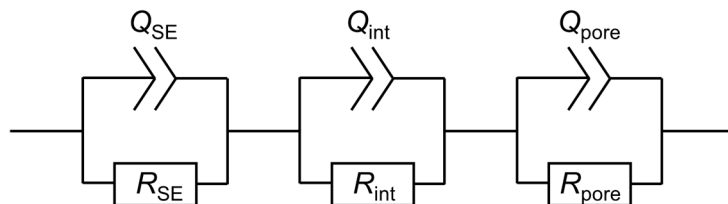

**Figure S3.** Equivalent circuit for fitting the electrochemical impedance of Li symmetric cell.

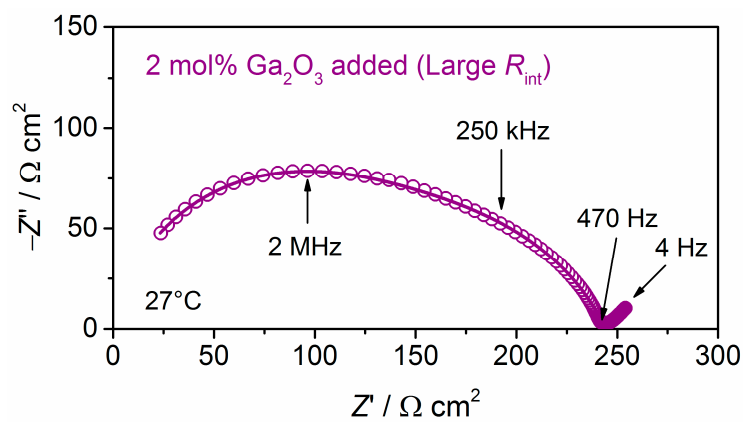

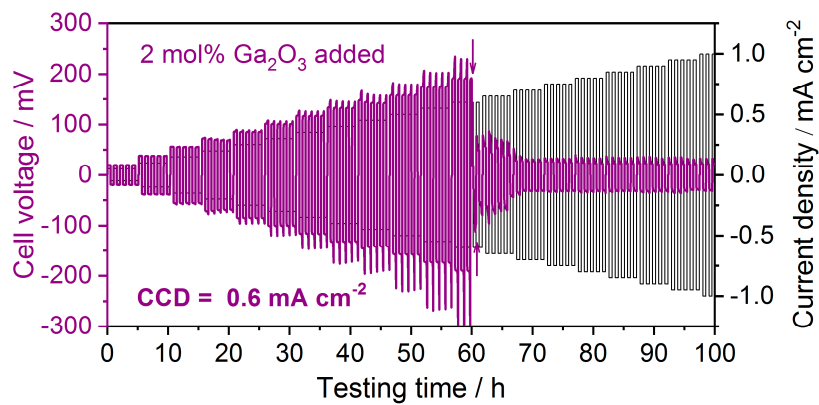

**Figure S4.** Nyquist plot for complex impedance (top) and voltage response in galvanostatic cycling test (bottom) for Li symmetric cell with larger interfacial resistance  $R_{\text{int}}$  composed of 2 mol %  $\text{Ga}_2\text{O}_3$  added Ta-doped LLZO.

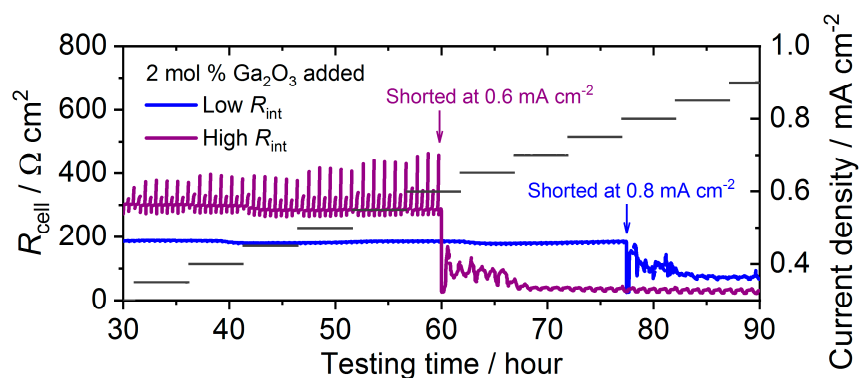

**Figure S5.** Change in cell resistance  $R_{\text{cell}}$  during galvanostatic cycling test for Li symmetric cells with different  $R_{\text{int}}$  composed of 2 mol %  $\text{Ga}_2\text{O}_3$  added Ta-doped LLZO.
